# Supplementary material for: Inexpensive multi-patient respiratory monitoring system for helmet ventilation during COVID-19 pandemic
Source: bioRxiv or medRxiv preprint supplement (doi:10.1101/2020.06.29.20141283), 2021-06-14

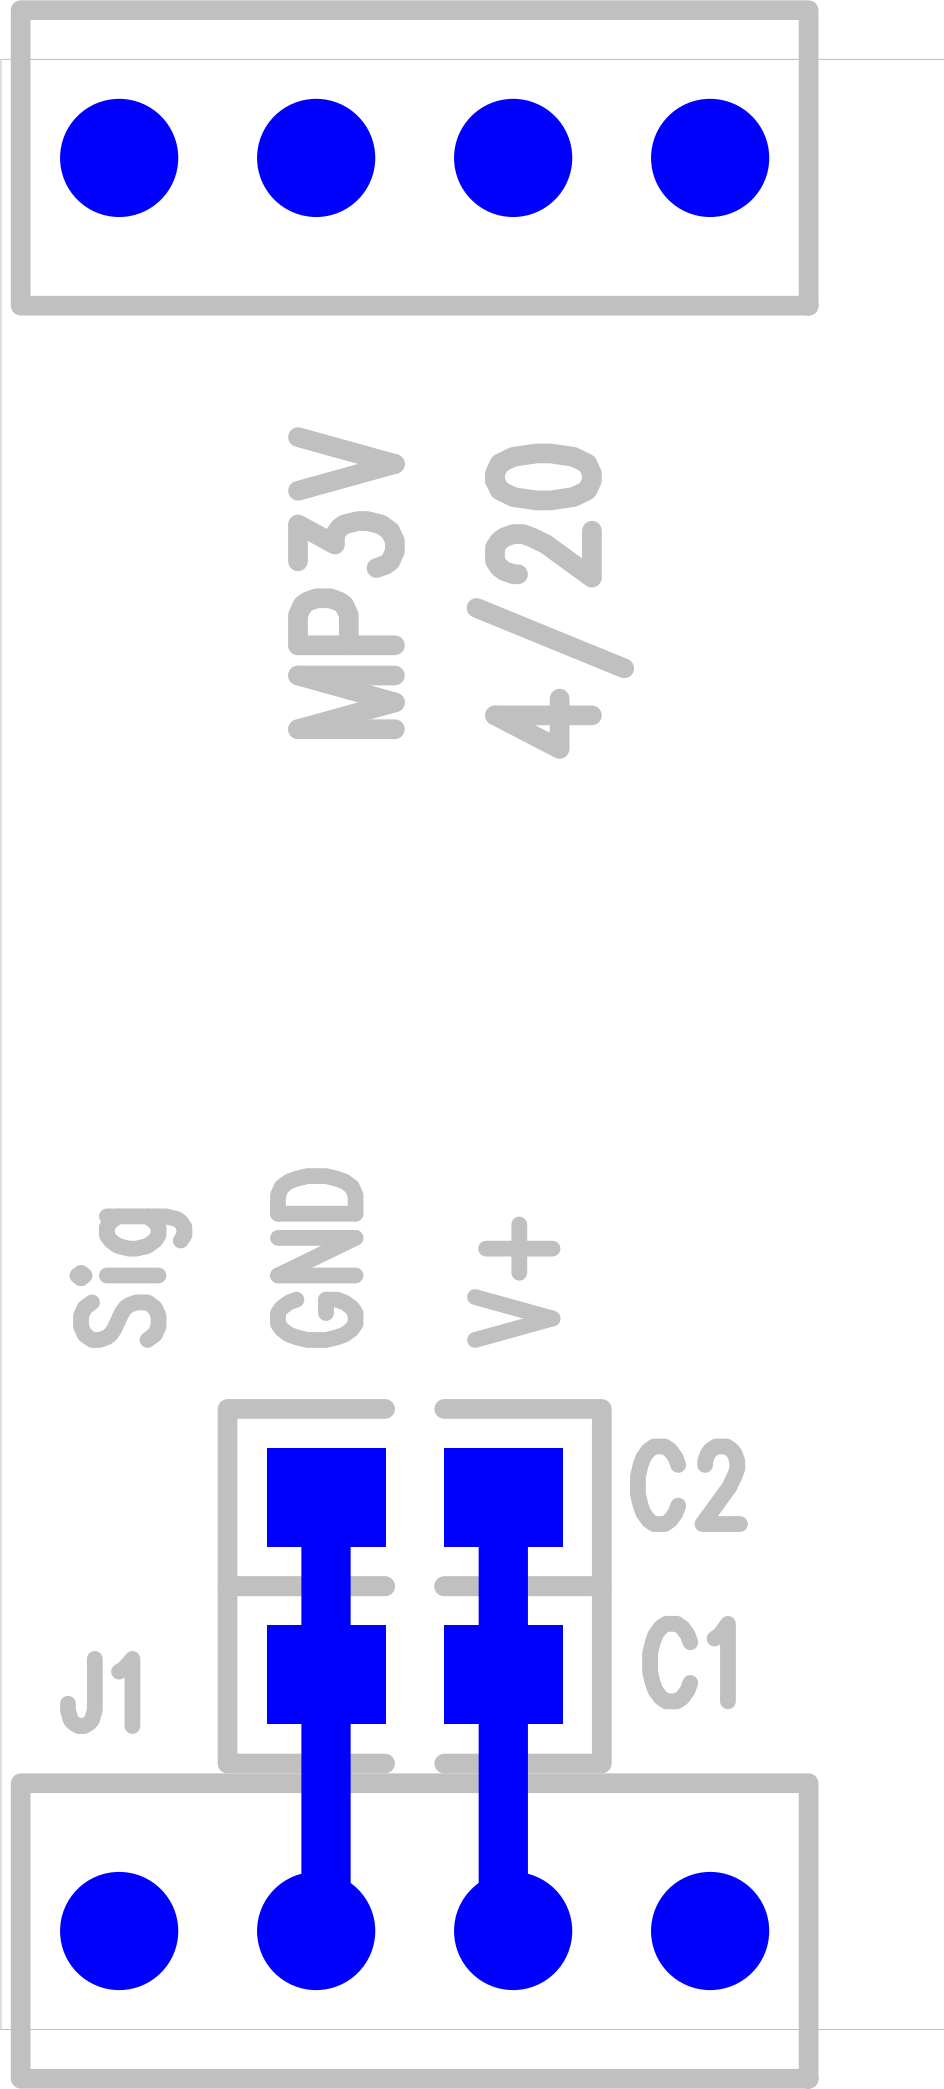

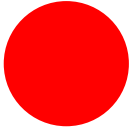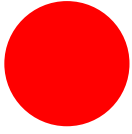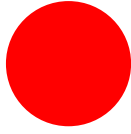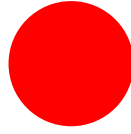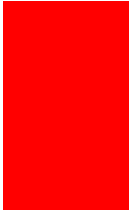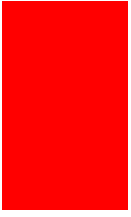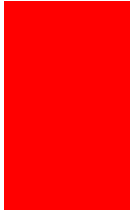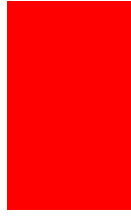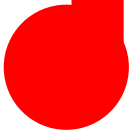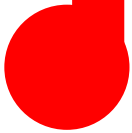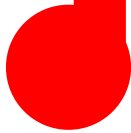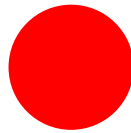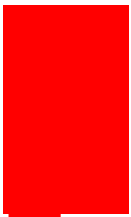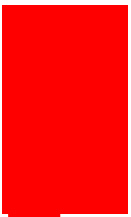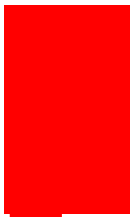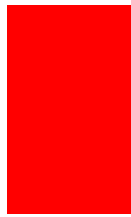

ru

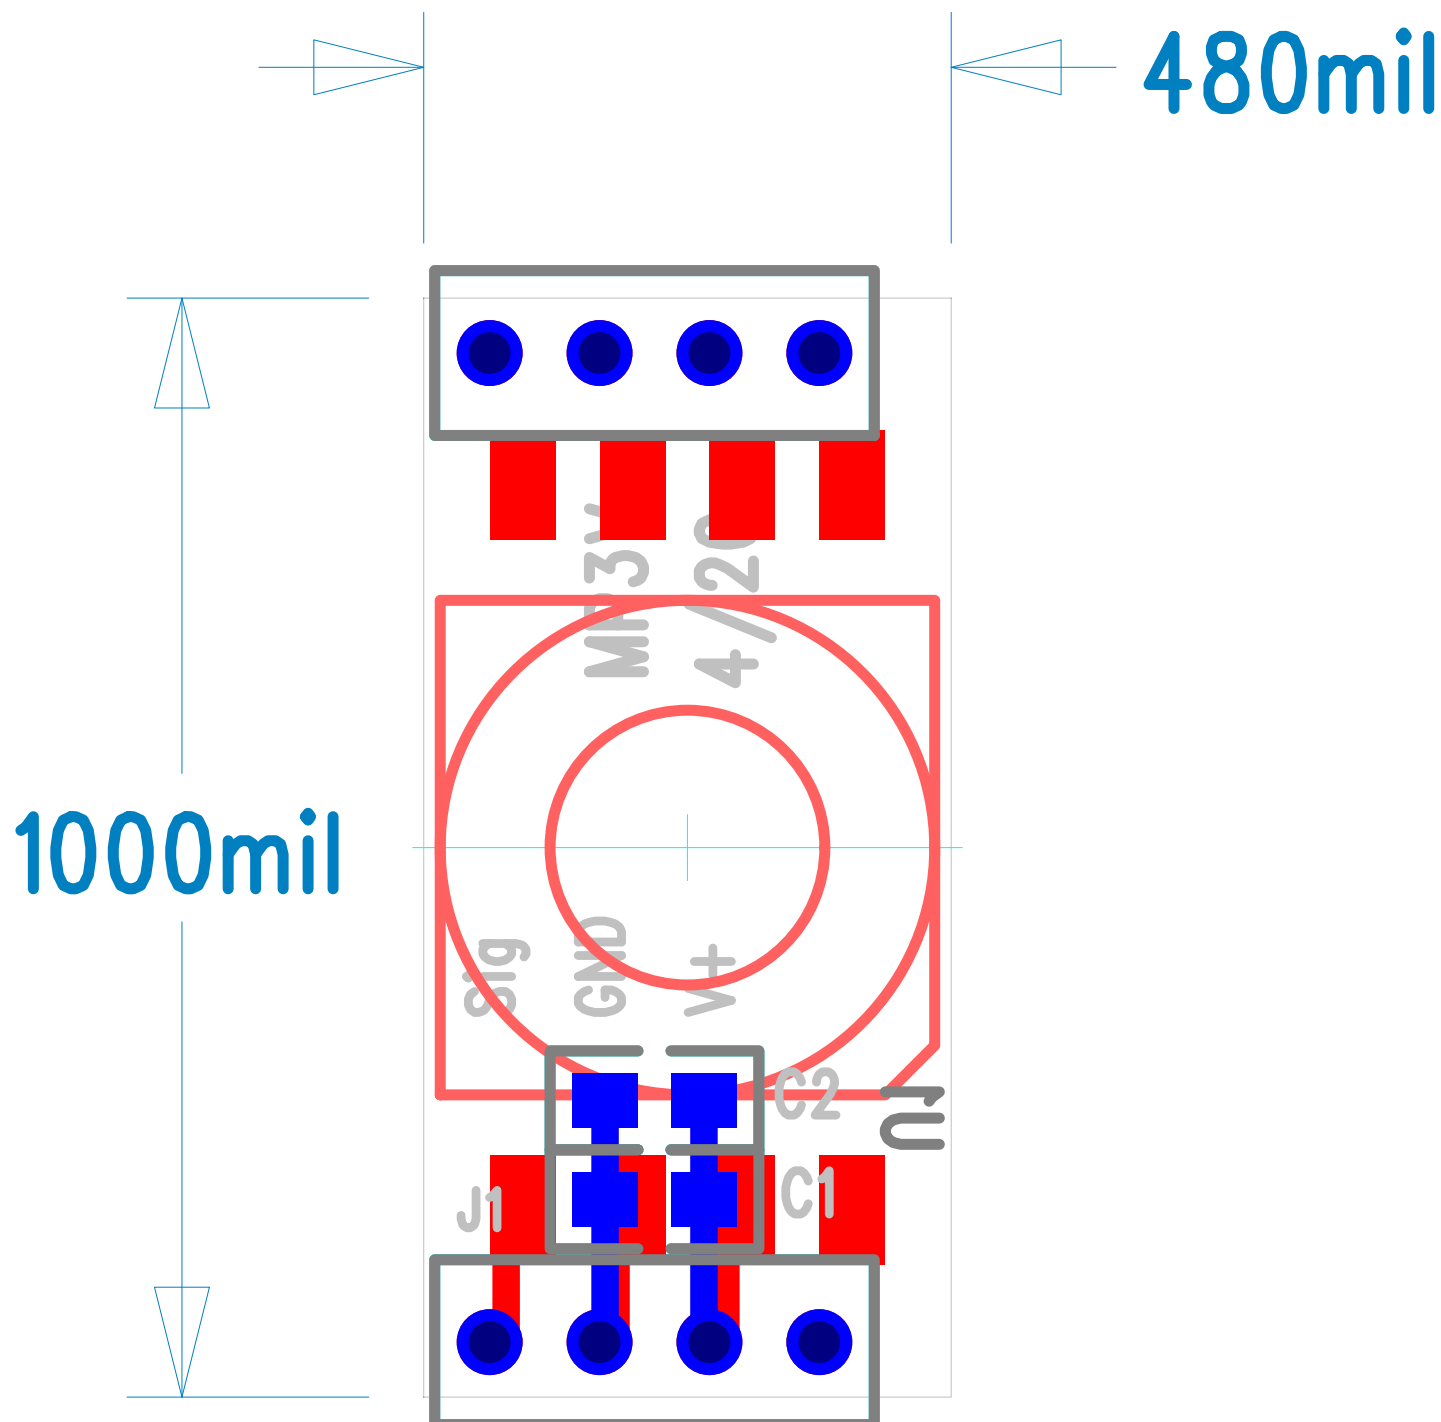

Supplement: Supplementary file [file 2020.06.29.20141283-1.zip]
