# Supplementary material for: Inexpensive multi-patient respiratory monitoring system for helmet ventilation during COVID-19 pandemic
Source: bioRxiv or medRxiv preprint supplement (doi:10.1101/2020.06.29.20141283), 2021-06-14
Supplement: Supplementary file [file 2020.06.29.20141283-1.zip]

6

5

4

3

2

1

D

D

C

C

B

B

A

A

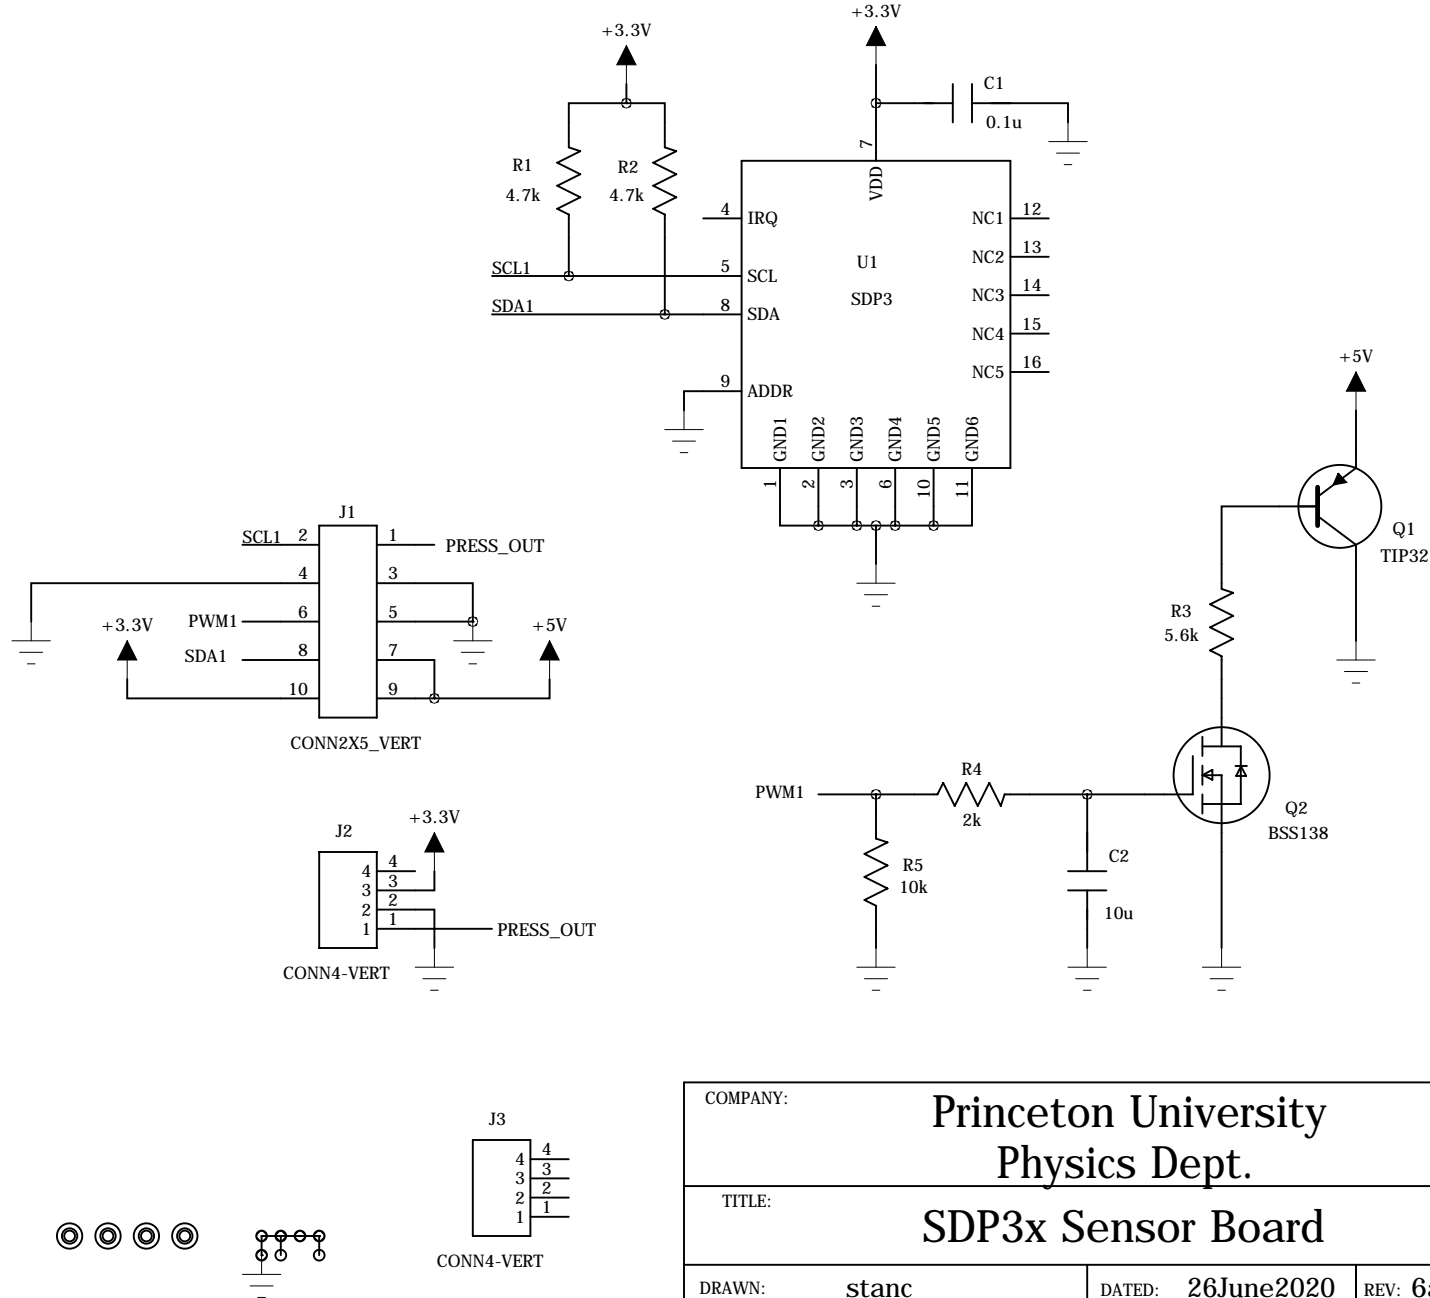

COMPANY:

Princeton University  
Physics Dept.

TITLE:

SDP3x Sensor Board

DRAWN: stanc

DATED: 26June2020

REV: 6a

SHEET: 1 of 1
