# Supplementary material for: Inexpensive multi-patient respiratory monitoring system for helmet ventilation during COVID-19 pandemic
Source: bioRxiv or medRxiv preprint supplement (doi:10.1101/2020.06.29.20141283), 2021-06-14
Supplement: Supplementary file [file 2020.06.29.20141283-1.zip]

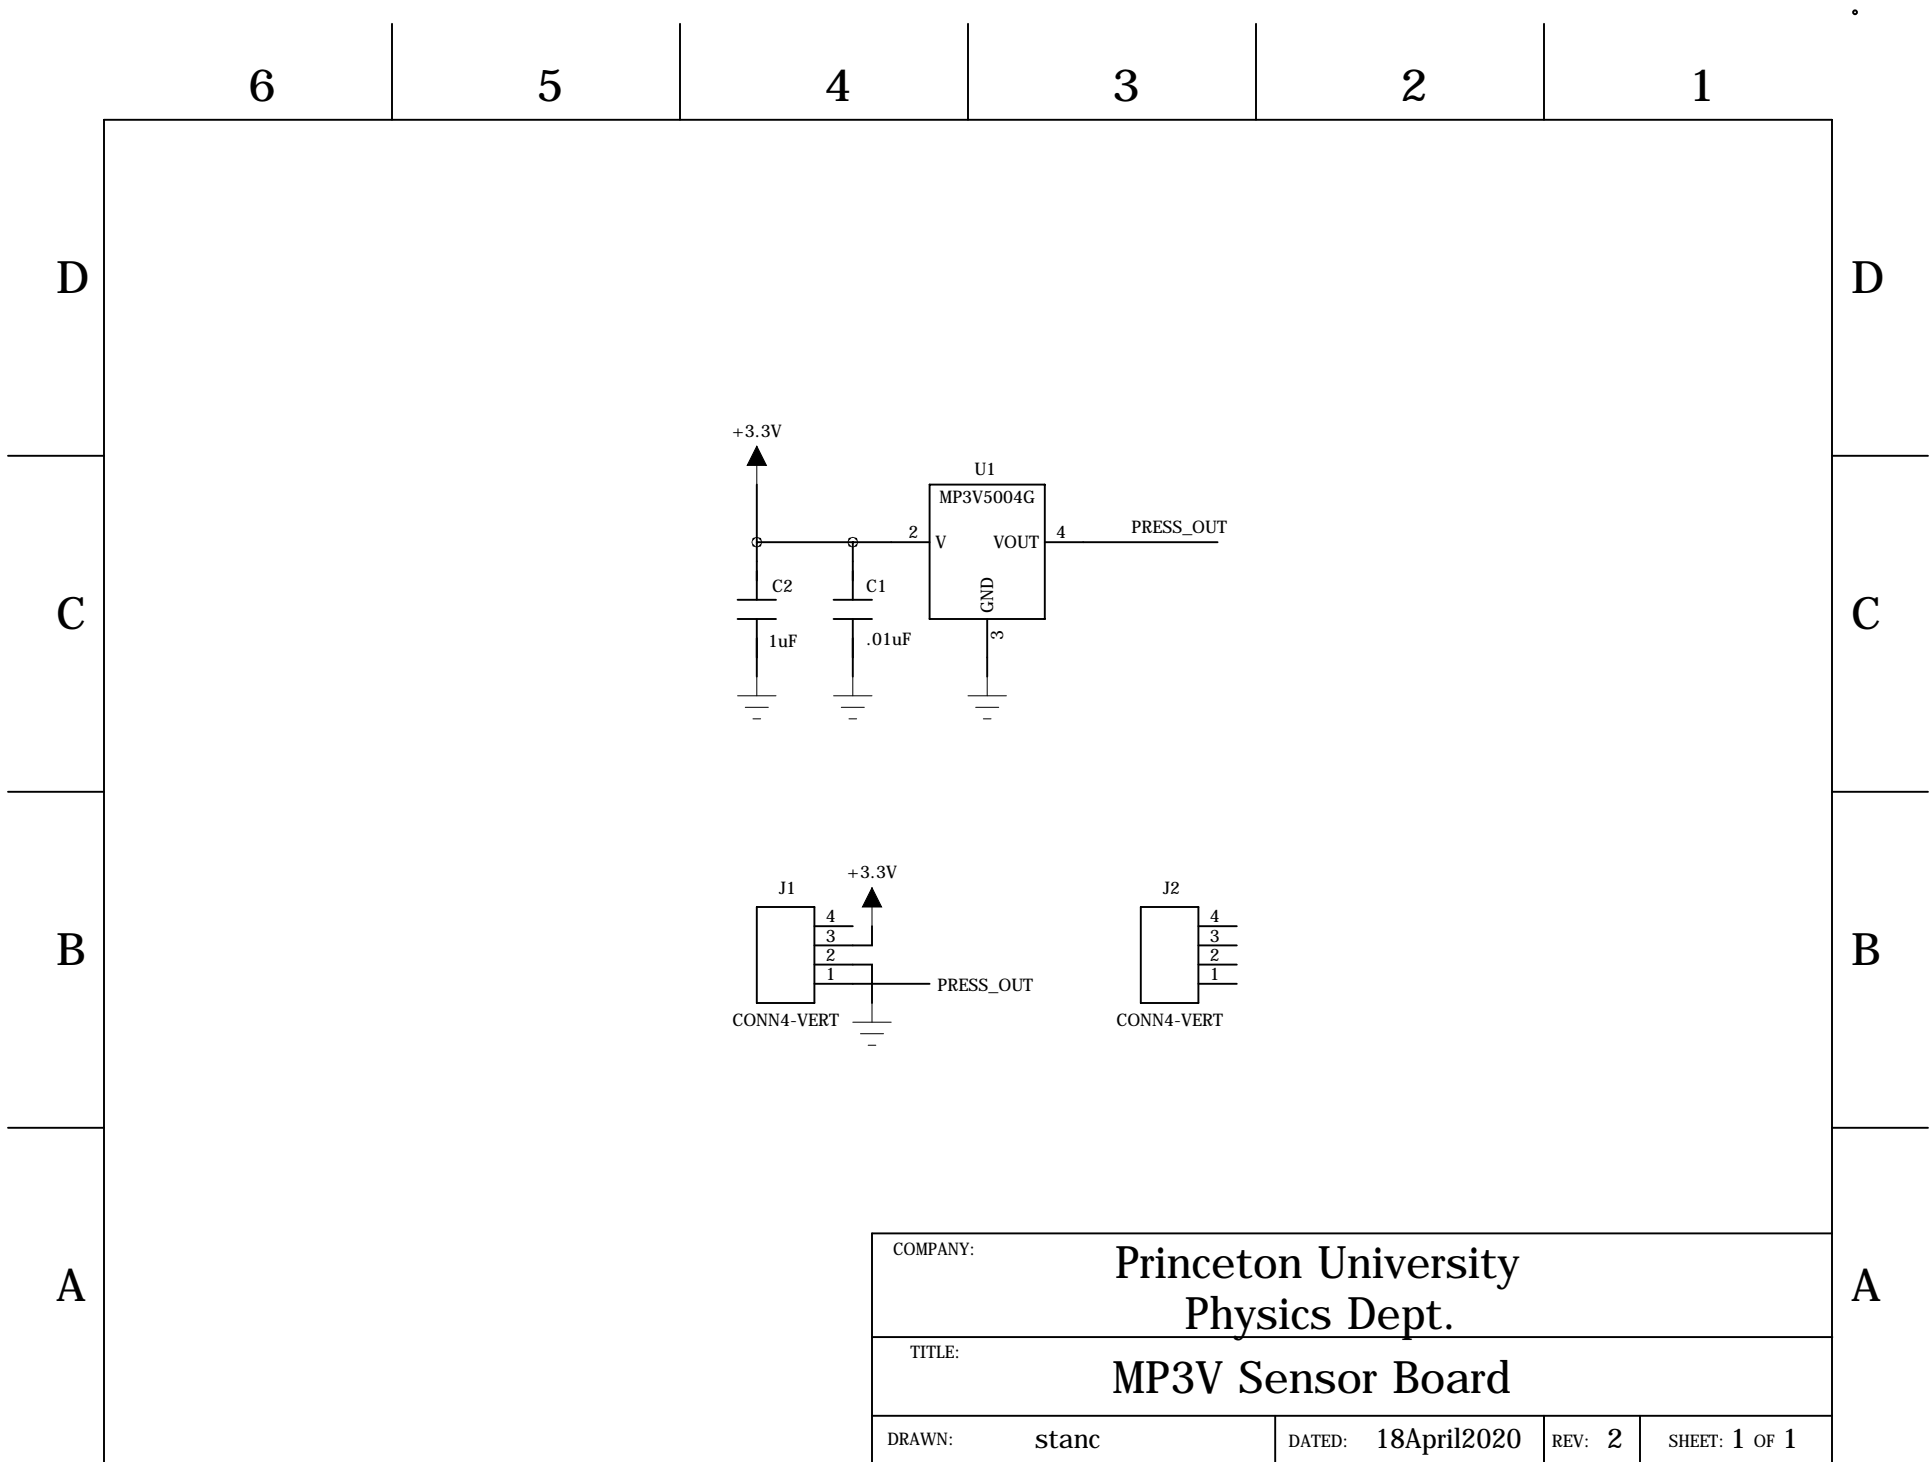

|          |  |       |  |                      |  |               |        |
|----------|--|-------|--|----------------------|--|---------------|--------|
| COMPANY: |  |       |  | Princeton University |  |               |        |
|          |  |       |  | Physics Dept.        |  |               |        |
| TITLE:   |  |       |  | MP3V Sensor Board    |  |               |        |
| DRAWN:   |  | stanc |  | DATED:               |  | 18April2020   | REV: 2 |
|          |  |       |  |                      |  | SHEET: 1 of 1 |        |
