# Supplementary material for: Inexpensive multi-patient respiratory monitoring system for helmet ventilation during COVID-19 pandemic
Source: bioRxiv or medRxiv preprint supplement (doi:10.1101/2020.06.29.20141283), 2021-06-14
Supplement: Supplementary file [file 2020.06.29.20141283-1.zip]

THIS SURFACE WITH  
SMOOTH FINISH

**Tolerance for the Nozzles**  
Length .827" [-0.000 + 0.010 ]  
End diameter .866" +- .004"  
Root diameter .887" +- .004 "

D

C

B

A

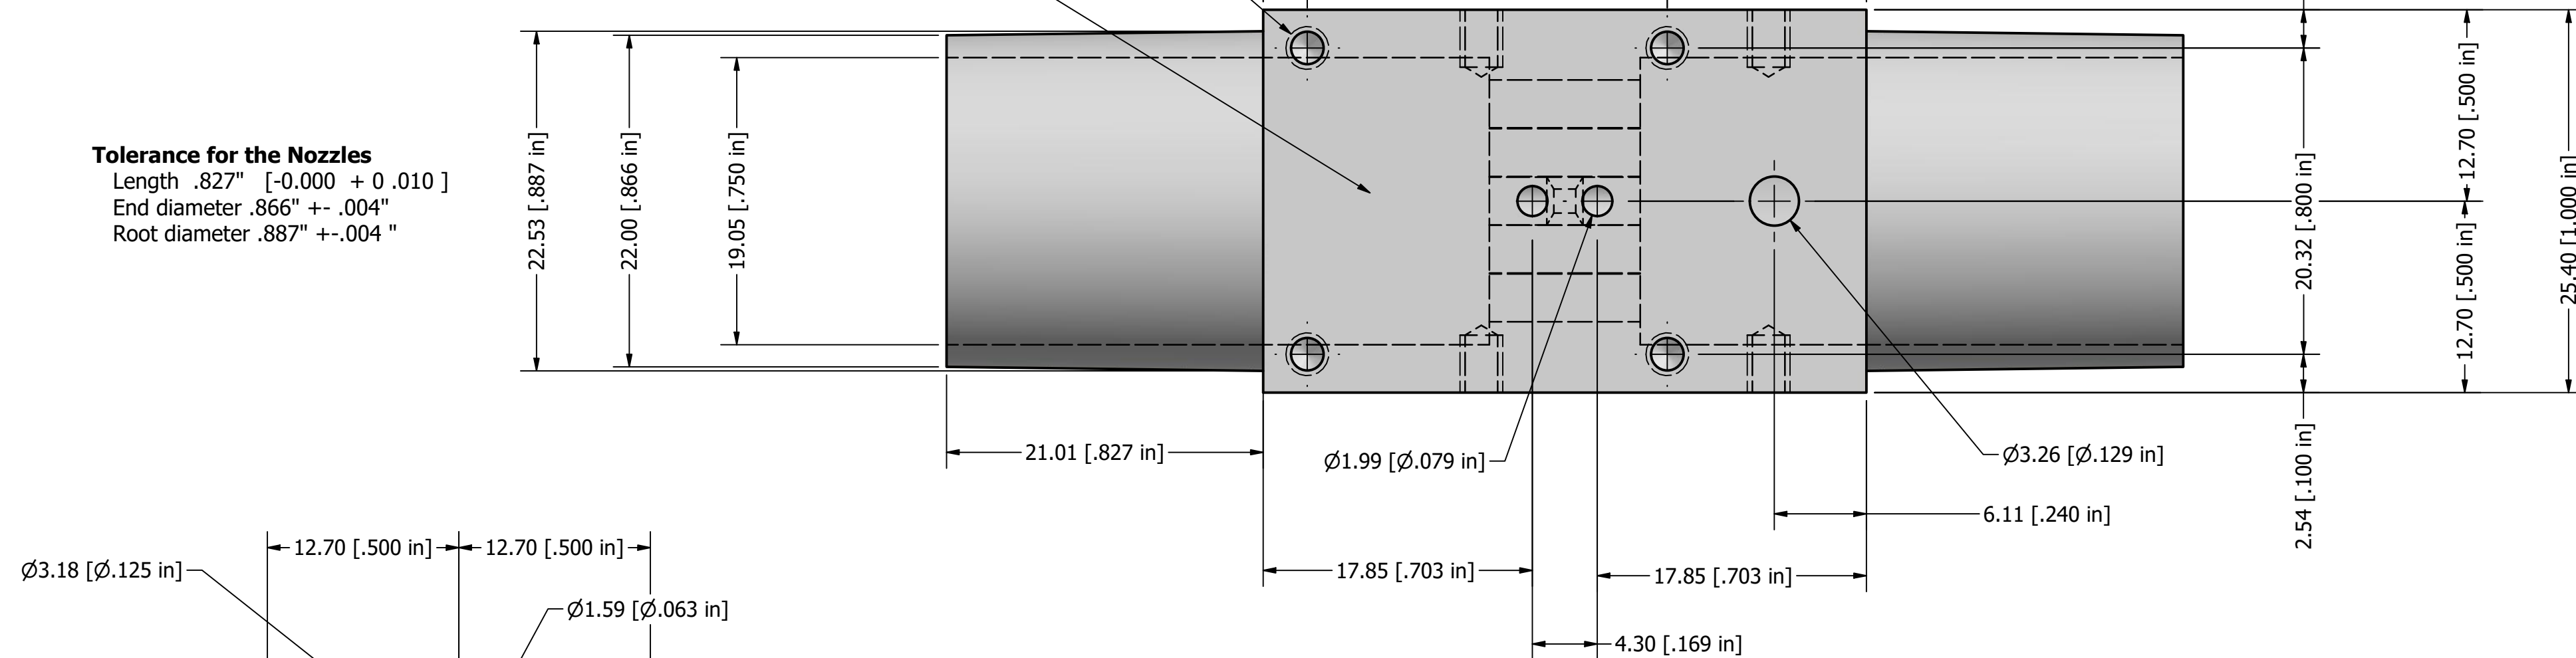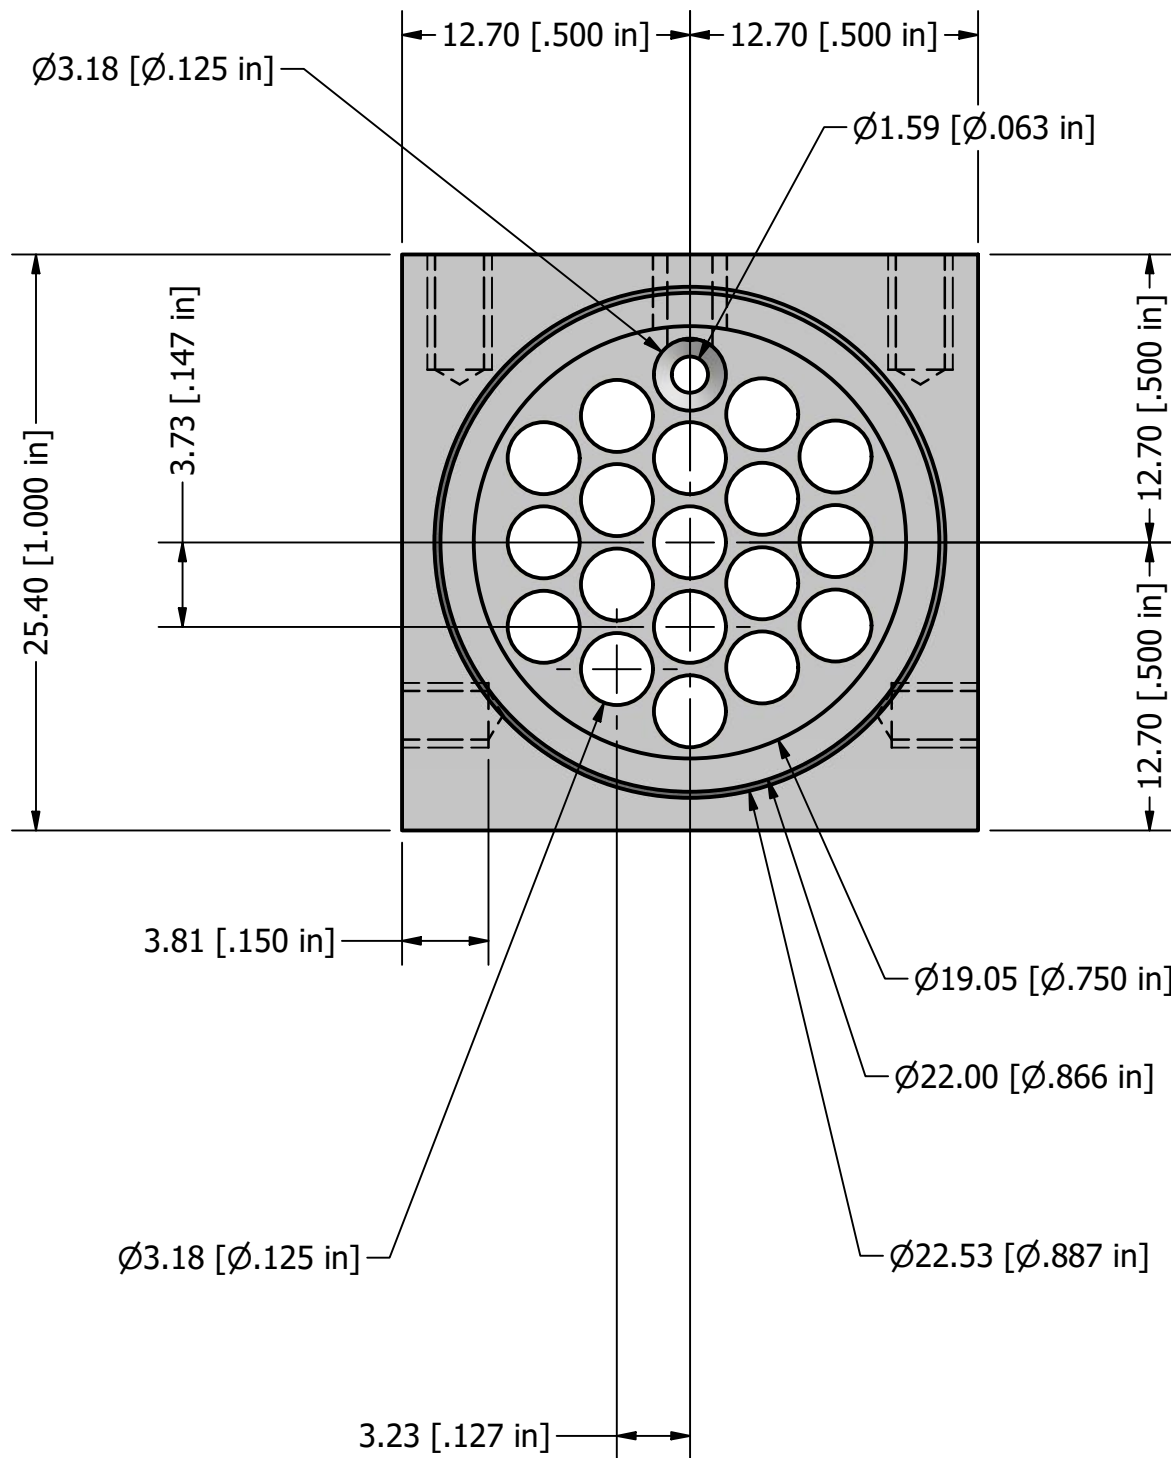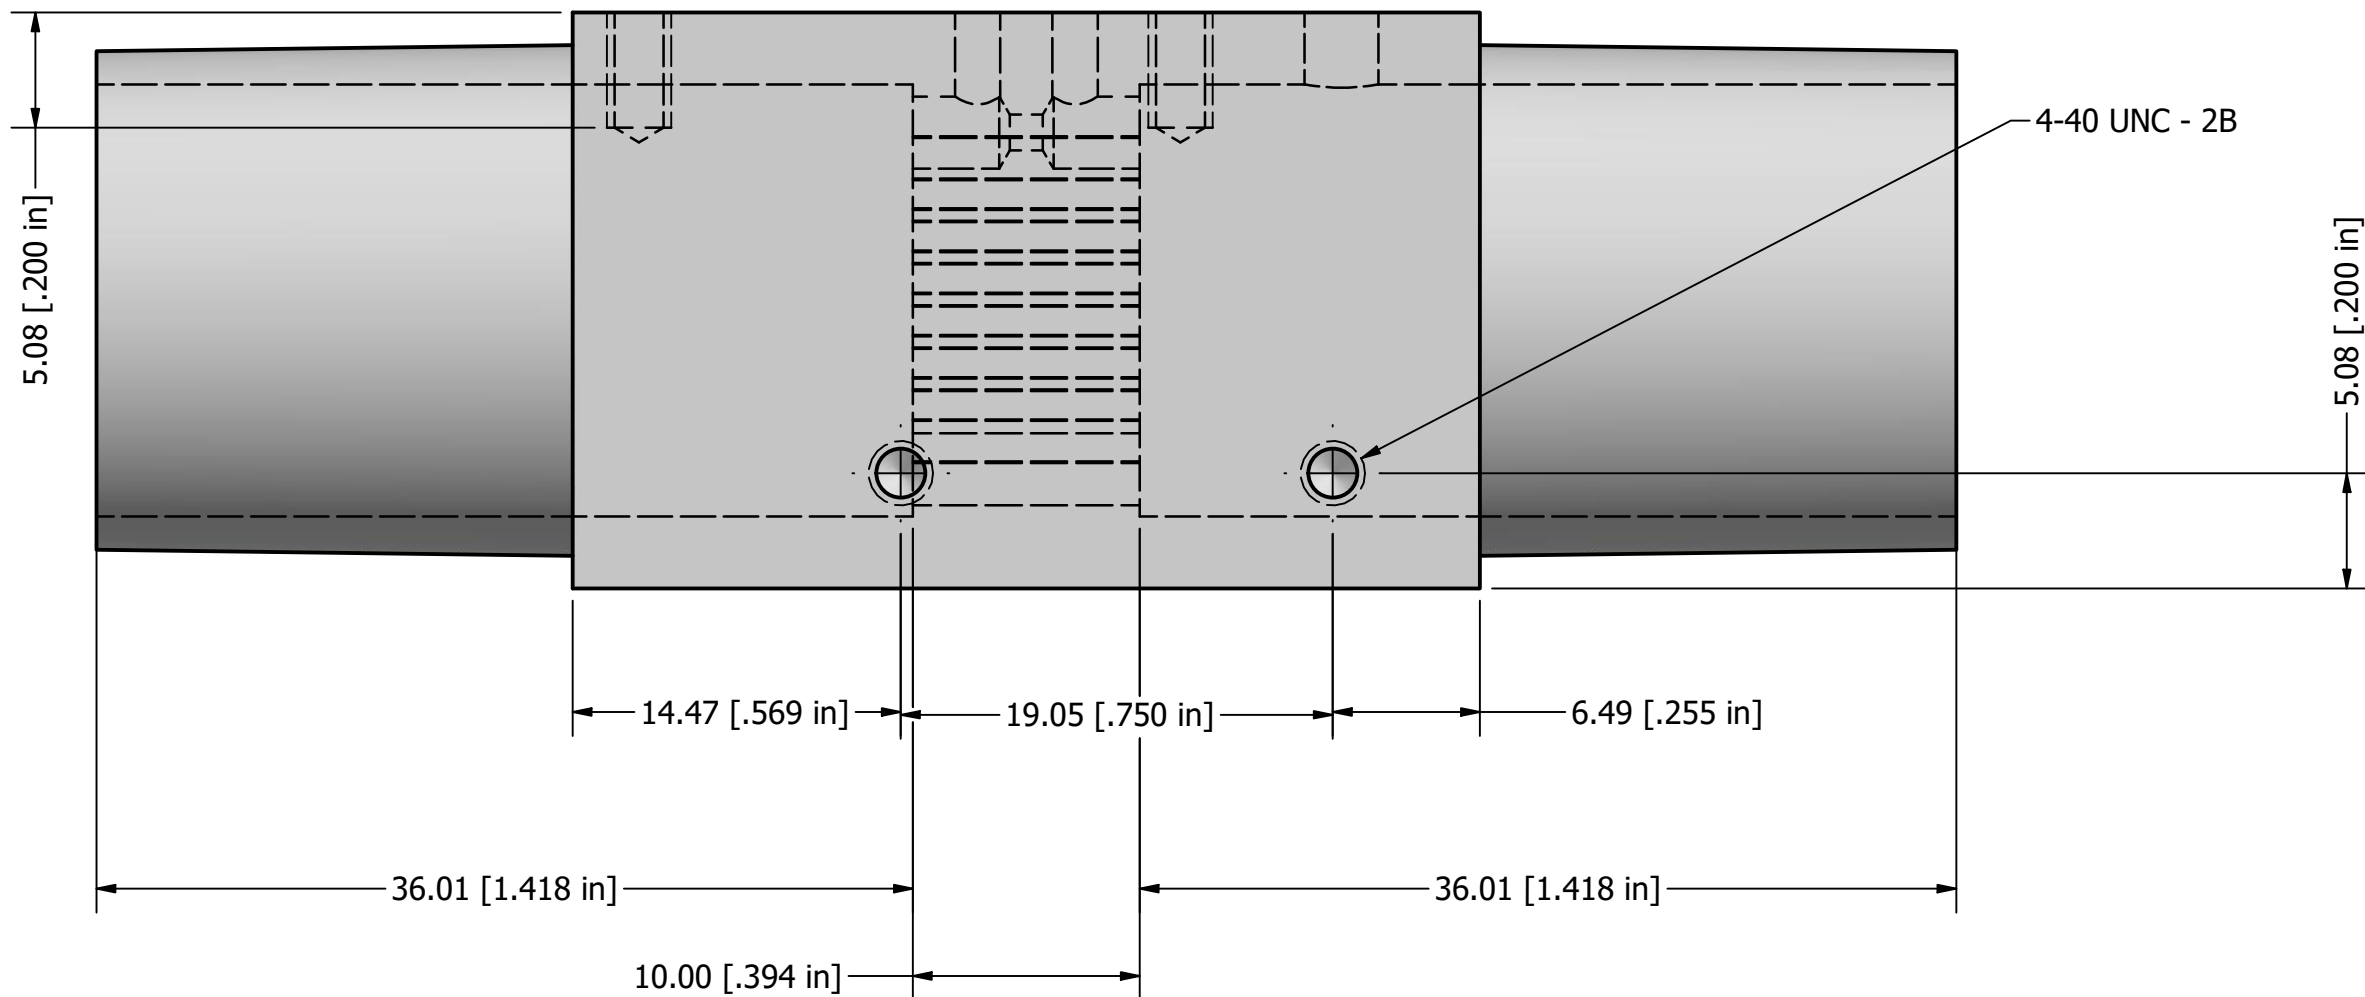

WHITE DELRIN

|                                     |                   |                      |                          |     |
|-------------------------------------|-------------------|----------------------|--------------------------|-----|
| DRAWN<br>Princeton Open Vent Nozzle | DATE<br>10/1/2020 | Princeton University |                          |     |
| CHECKED                             |                   | TITLE                |                          |     |
| QA                                  |                   | IceHoney500          |                          |     |
| MFG                                 |                   |                      |                          |     |
| APPROVED                            |                   |                      |                          |     |
|                                     |                   | SIZE<br>C            | DWG NO<br>IceHoney500_v2 | REV |
|                                     |                   | SCALE<br>3 : 1       | SHEET 1 OF 2             |     |

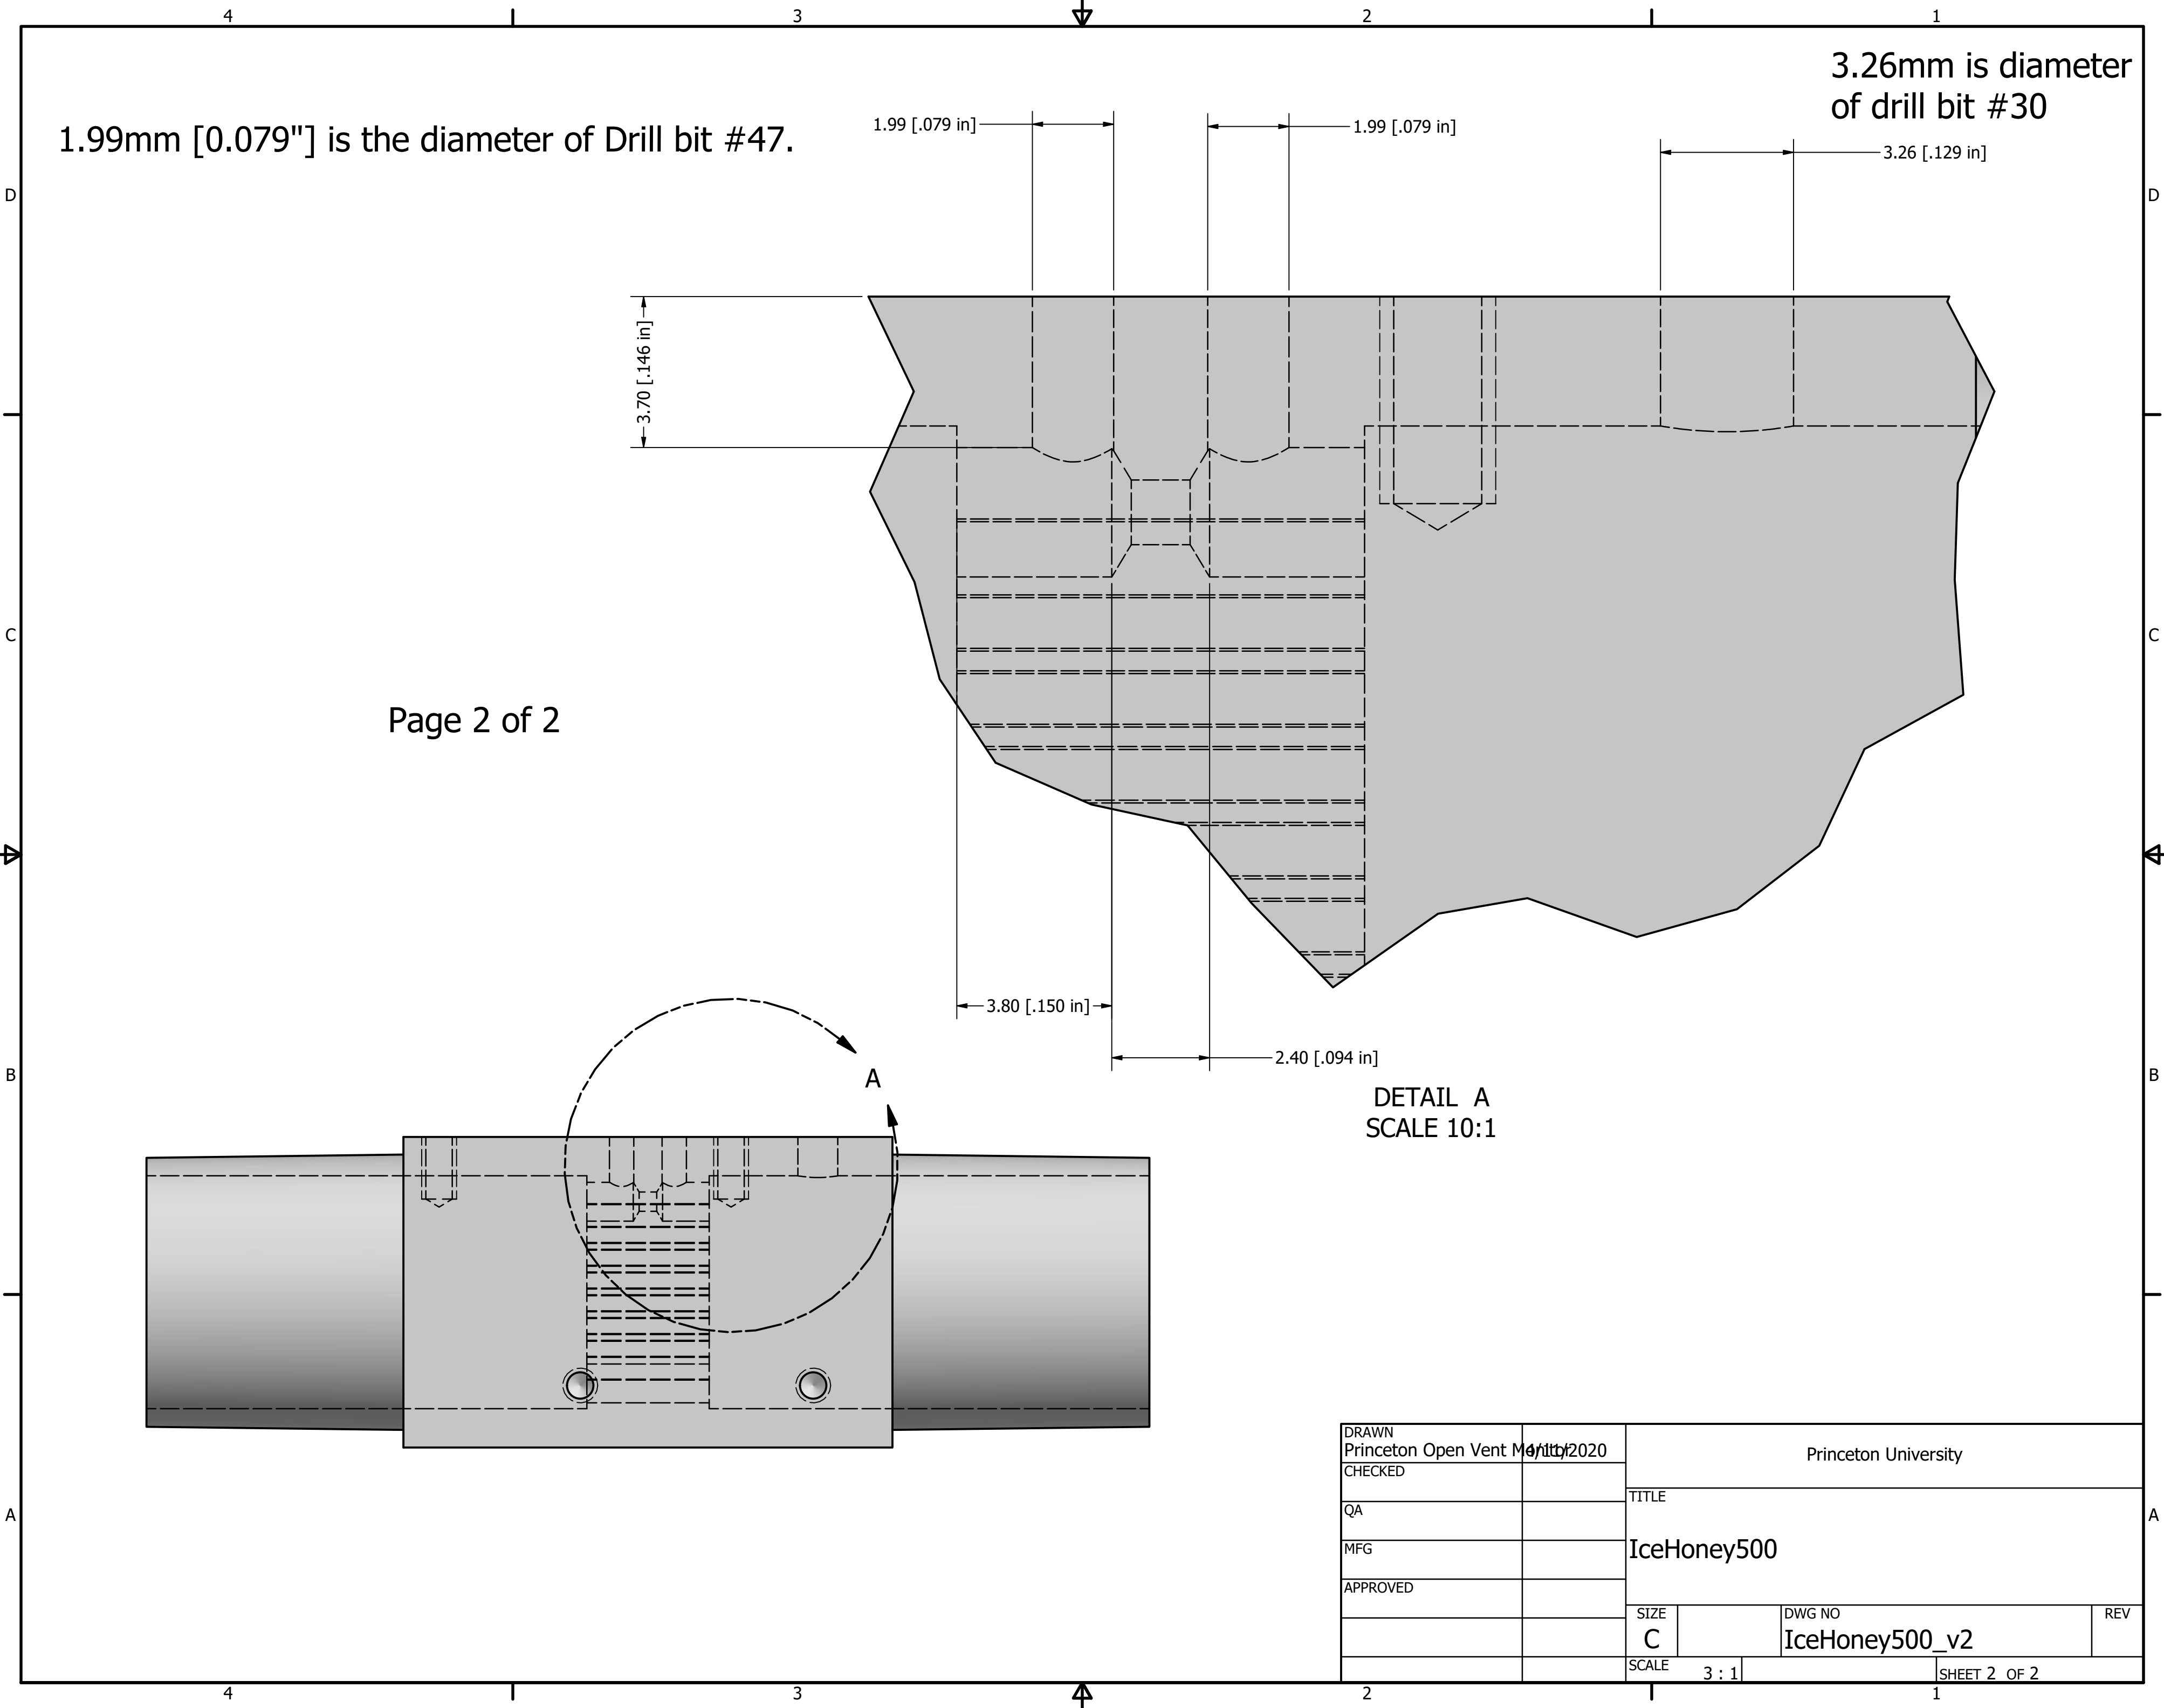

|                                        |                      |                |                          |     |
|----------------------------------------|----------------------|----------------|--------------------------|-----|
| DRAWN<br>Princeton Open Vent Mod, 2020 | Princeton University |                |                          |     |
| CHECKED                                |                      | TITLE          |                          |     |
| QA                                     |                      | IceHoney500    |                          |     |
| MFG                                    |                      |                |                          |     |
| APPROVED                               |                      | SIZE<br>C      | DWG NO<br>IceHoney500_v2 | REV |
|                                        |                      | SCALE<br>3 : 1 | SHEET 2 OF 2             |     |
